# Supplementary material for: Genome-Wide Characterization and Expression Profiling of HD-Zip Genes in ABA-Mediated Processes in Fragaria vesca
Source: Plants (Basel). 2022 Dec 4;11(23):3367. doi: 10.3390/plants11233367 (PMC9737017; doi:10.3390/plants11233367)
Supplement: Supplementary file 1 [file plants-11-03367-s001.zip › supplementary tables.xlsx]

## Sheet: Table S1
Table S1. Features of the putative FveHDZ genes in F. vesca
	Gene name	Gene ID	Chr	Chr Location(Mb)		Strand
				start	end
	FveHDZ1	FvH4_5g36570	LG5	26.8199	26.8211	+
	FveHDZ2	FvH4_1g20230	LG1	12.444	12.4454	+
	FveHDZ3	FvH4_7g32570	LG7	23.3964	23.3972	-
	FveHDZ4	FvH4_7g17320	LG7	14.7447	14.7455	-
	FveHDZ5	FvH4_6g17450	LG6	11.3784	11.3798	-
	FveHDZ6	FvH4_6g50570	LG6	37.6193	37.6213	-
	FveHDZ7	FvH4_4g32060	LG4	30.8922	30.8939	+
	FveHDZ8	FvH4_5g15520	LG5	8.76058	8.76186	+
	FveHDZ9	FvH4_6g49000	LG6	36.7977	36.7993	+
	FveHDZ10	FvH4_4g31640	LG4	30.6963	30.6976	+
	FveHDZ11	FvH4_3g19270	LG3	12.4524	12.4529	-
	FveHDZ12	FvH4_3g06360	LG3	3.6486	3.64979	-
	FveHDZ13	FvH4_1g13930	LG1	7.6658	7.66727	-
	FveHDZ14	FvH4_7g09820	LG7	9.37911	9.3806	+
	FveHDZ15	FvH4_5g19570	LG5	11.4075	11.4089	+
	FveHDZ16	FvH4_1g18530	LG1	10.8856	10.8868	+
	FveHDZ17	FvH4_4g06590	LG4	5.88486	5.88596	+
	FveHDZ18	FvH4_6g22050	LG6	15.7275	15.729	-
	FveHDZ19	FvH4_4g32460	LG4	31.0953	31.0971	-
	FveHDZ20	FvH4_2g32410	LG2	24.5762	24.5772	-
	FveHDZ21	FvH4_6g31780	LG6	24.8755	24.8793	-
	FveHDZ22	FvH4_7g13350	LG7	12.001	12.0059	+
	FveHDZ23	FvH4_7g29130	LG7	21.529	21.5328	+
	FveHDZ24	FvH4_6g43390	LG6	33.5769	33.582	-
	FveHDZ25	FvH4_3g02520	LG3	1.26859	1.27224	-
	FveHDZ26	FvH4_5g22940	LG5	14.2557	14.2605	+
	FveHDZ27	FvH4_5g18090	LG5	10.4	10.4032	+
	FveHDZ28	FvH4_2g35360	LG2	26.0882	26.0931	+
	FveHDZ29	FvH4_3g10070	LG3	5.8496	5.85513	-
	FveHDZ30	FvH4_3g32190	LG3	27.4299	27.436	-
	FveHDZ31	FvH4_6g32240	LG6	25.2863	25.2923	+

## Sheet: Table S2
Table S2. Identification of cis-element in the promoter region of FveHDZ genes
								FveHD-ZIP I													FveHD-ZIP II							FveHD-ZIP III				FveHD-ZIP IV
Classification	Cis_name	Cis_function_description	Total_occurrence	occur_I	occur_II	occur_III	occur_IV	FveHDZ1	FveHDZ2	FveHDZ3	FveHDZ4	FveHDZ5	FveHDZ6	FveHDZ7	FveHDZ8	FveHDZ9	FveHDZ10	FveHDZ11	FveHDZ12	FveHDZ13	FveHDZ14	FveHDZ15	FveHDZ16	FveHDZ17	FveHDZ18	FveHDZ19	FveHDZ20	FveHDZ28	FveHDZ29	FveHDZ30	FveHDZ31	FveHDZ21	FveHDZ22	FveHDZ23	FveHDZ24	FveHDZ25	FveHDZ26	FveHDZ27
Phytohormone responsive	ABRE	abscisic acid responsiveness	46	29	9	2	6	4	1	1	8	1	2	3	2		1	4		2					3	3	3		1	1		l					5
	GARE-motif	gibberellin-responsive element	5	2	1	2	0				1							1								1		1	1
	TATC-box	gibberellin-responsiveness	4	2	1	1	0					1						1			1										1
	P-box	gibberellin-responsive element	17	6	4	1	6							1	1				2	2	1	1			1	1		1				2		1	2			1
	TCA-element	salicylic acid responsiveness	18	5	4	2	7	1				1						2		1				1	1		2		1	1				2	1	2		2
	SARE	salicylic acid responsiveness	1	1	0	0	0			1
	TGA-element	auxin-responsive element	12	4	5	1	2								1			1	2		2	1			1		1				1				1		1
	AuxRR-core	auxin responsiveness	3	2	0	0	1					2																						1
	ERE	ethylene-responsive element	16	12	2	1	1		2		1			1	3		2	1	1	1					2			1							1
	CGTCA-motif	MeJA-responsiveness	33	10	10	6	7			1	1		1	1		1		3		2	2	1		2	1	1	3	1	1	1	3	2	1			2	2
	TGACG-motif	MeJA-responsiveness	33	10	10	6	7			1	1		1	1		1		3		2	2	1		2	1	1	3	1	1	1	3	2	1			2	2
Abiotic and biotic stresses	MBS	drought-inducibility	14	7	2	0	5					1		3		1		1	1						1		1					2	1	1				1
	LTR	low-temperature responsiveness	17	5	6	3	3		1		2	1		1							3			1		2		1		1	1					1	1	1
	ARE	anaerobic induction	72	23	12	16	21	3	3	1	3	1	3		2	2		2		3	3	2	2	2	1	2		3	3	3	7	2	2	6	4	3	3	1
	TC-rich repeats	defense and stress responsiveness	13	4	4	2	3	2	1											1	1		1		1		1	2							2			1
	GC-motif	anoxic specific inducibility	3	1	1	0	1					1														1										1
	WUN-motif	wound-responsive element	11	6	2	3	0		1	2		1			1			1					2							1	2
Plant growth and development	circadian	circadian control	3	2	0	0	1											1		1												1
	GCN4_motif	endosperm expression	4	3	1	0	0	1							2												1
	O2-site	zein metabolism regulation	8	2	4	2	0					1								1	2				1	1		2
	RY-element	seed-specific regulation	4	1	2	1	0					1											1		1			1
	MBSI	flavonoid biosynthetic genes regulation	1	1	0	0	0											1
	HD-Zip 1	differentiation of the palisade mesophyll cells	2	0	2	0	0															1	1
	HD-Zip 3	protein binding site	1	0	0	0	1																													1
light responsive element	3-AF1 binding site	light responsive element	5	1	0	1	3				1																		1			1	1	1
	G-Box	light responsive element	60	35	11	5	9	5	1	2	10	2	2	2	3		1	5		2	1				3	3	4		1	2	2	2					7
	GT1-motif	light responsive element	29	12	10	1	6	2	2	1		1		2	1	1			1	1	1	1		3	1	2	2			1			1		1	1	2	1
	MRE	light responsive element	10	2	1	4	3			1							1						1					2	1		1				1		1	1
	AAAC-motif	light responsive element	1	0	0	0	1																															1
	Sp1	light responsive element	2	0	1	0	1															1												1
	ACE	light responsive element	2	1	1	0	0			1															1
	ACA-motif	light responsive element (partial)	1	1	0	0	0				1
	AE-box	light responsive element (partial)	9	4	2	2	1		1						1			1	1		2							1			1			1
	AT1-motif	light responsive element (partial)	1	1	0	0	0											1
	ATC-motif	light responsive element (partial)	2	0	2	0	0																		1	1
	ATCT-motif	light responsive element (partial)	3	2	0	0	1										1			1																1
	Box 4	light responsive element (partial)	41	19	11	4	7		1			5	1	1		2	1	1	3	4	2	3	2		2	2		2	1	1				2	1		1	3
	chs-CMA1a	light responsive element (partial)	7	6	1	0	0		1		1	1			1	1			1			1
	chs-Unit 1 m1	light responsive element (partial)	1	1	0	0	0							1
	GA-motif	light responsive element (partial)	2	0	1	0	1																	1								1
	Gap-box	light responsive element (partial)	1	0	0	1	0																						1
	GATA-motif	light responsive element (partial)	15	8	2	3	2		2	1	1					1	1	1		1	1			1					2		1		1			1
	GTGGC-motif	light responsive element (partial)	2	1	0	0	1											1														1
	I-box	light responsive element (partial)	8	4	0	1	3	1	1								1			1									1				1	1			1
	LAMP-element	light responsive element (partial)	7	3	2	1	1				2									1	2									1						1
	L-box	light responsive element (partial)	1	0	0	1	0																								1
	TCCC-motif	light responsive element (partial)	15	7	3	0	5		2		1	2		1		1								1	2								1	1	1		1	1
	TCT-motif	light responsive element (partial)	25	12	5	3	5		4	1			3		2		2				1	1		1	2					2	1		3			1	1

## Sheet: Table S3
Table S3. The grape HD-Zip orthologs of the 13 WGD/segmental duplicate FveHDZs
Gene name	Orthologs in grape	Gene name	Orthologs in grape
FveHDZ1	VvHDZ12	FveHDZ2	VvHDZ32
FveHDZ3 *	VvHDZ27 / VvHDZ28	FveHDZ4 *	VvHDZ27 / VvHDZ28
FveHDZ7 *	VvHDZ4 / VvHDZ30	FveHDZ8 *	VvHDZ30
FveHDZ9 *	VvHDZ5 / VvHDZ24	FveHDZ10 *	VvHDZ5 / VvHDZ24
FveHDZ14	VvHDZ01 / VvHDZ25	FveHDZ15	VvHDZ01 / VvHDZ25
FveHDZ16	VvHDZ02	FveHDZ20	VvHDZ02 / VvHDZ33
FveHDZ25	VvHDZ19
* Their grape HD-zip orthologs are located in the syntenic regions in the grape genome [48]

## Sheet: Table S4
Table S4. The primers used in the yeast one-hybrid assays
	Primer name	Sequence (5’-3’)
	FvePP2C6-F1_F	gatgaattgaaaagcttGATGGATCTGTAAACCCTAAT
	FvePP2C6-F1_R	agagcacatgcctcgagCTCTTCTCTTCTTTGGAAGC
	FvePP2C6-F2_F	gatgaattgaaaagcttCAGGAATTCTCTACGAGAGTAA
	FvePP2C6-F2_R	agagcacatgcctcgagAGGTTCAAGACAACATTTGATG
	FvePP2C1-F1_F	gatgaattgaaaagcttCAGTCTCATCAAATGCATGATA
	FvePP2C1-F1_R	agagcacatgcctcgagTATGTTAAGAGACAGTCATGTG
	FveHDZ4-CDS_F	tggaggccagtgaattcATGTTTGAGTCAGACCAAGTTG
	FveHDZ4-CDS_R	tcgagctcgatggatccTCAAGACCAAAAATTCCACCAC
	FveHDZ20-CDS_F	tggaggccagtgaattcATGGGTTTGGATGAGCTTGG
	FveHDZ20-CDS_R	tcgagctcgatggatccCTAGCAAGCTGTAGATGGATGA

## Sheet: Table S5
Table S5. The primers used in our study for qRT-PCR
	Primer name	Sequence (5’-3’)
	FveHDZ1-F	GACTCTTTGGGTACCTTGATCC
	FveHDZ1-R	TGCCTGAAACTCCTTGCTATAA
	FveHDZ2-F	CAAGGCCAACTATGACTCTCTC
	FveHDZ2-R	AGTGGTTGCTCTCTGTGTTCTC
	FveHDZ3-F	GGGATGAAGGTCAGGATCAG
	FveHDZ3-R	TGCTACGCAACGGATCAAAC
	FveHDZ4-F	CTCGTTAGGAGCAGGCAGTG
	FveHDZ4-R	GCAGCTTCTTCCTAGGCTCC
	FveHDZ6-F	GTGTGACCCTGTTCATCTTCT
	FveHDZ6-R	CGATCCTCAACCTTGACACTAA
	FveHDZ7-F	TTTGACTCAGATAGCCCGCATT
	FveHDZ7-R	AGCTTCTAGTGAGGCTGTTGTC
	FveHDZ8-F	ACCTGGAAAGAAGAGACGGC
	FveHDZ8-R	GAACCAAATCGCAACCTGCC
	FveHDZ11-F	CAGGGCTCATGAACTGTGTTTG
	FveHDZ11-R	TAACCACATGATCCCCAAGCAA
	FveHDZ15-F	CCAGACTCATCATCCCAACAA
	FveHDZ15-R	TTGAACCCAGAATGAGGAGAAG
	FveHDZ16-F	CTGATTCCTTCGAGCCATCTT
	FveHDZ16-R	AGGAGACCCTTGCCTATACA
	FveHDZ18-F	TGGATTTCGGTGTCAGGAGAAG
	FveHDZ18-R	ATTGGTCCTTTGAGAGCCTGAG
	FveHDZ19-F	CAGAAAGAGGCTTTGGCTTTG
	FveHDZ19-R	CCCGAACCATCTCTTCAGATAC
	FveHDZ20-F	GATCTCACGCTAGGACCATCAG
	FveHDZ20-R	CTCTCTCTACCTCTTCACCGGA
	FveHDZ21-F	CAGACCATGTACCGGAGTATTG
	FveHDZ21-R	GGAACATTGGTTGCCATGAAG
	FveHDZ22-F	CGAACCCAGATGAAGACTCAAC
	FveHDZ22-R	GTTCCTCATGGCATCCCTAATC
	FveHDZ24-F	TCCACACCCTGATGACAAGC
	FveHDZ24-R	GTTCTCATGCCTCTCGTGCT
	FveHDZ26-F	GGAGGTGGGAATGTAGTCAA
	FveHDZ26-R	CGGAACAATGGAAGAGAAAGG
	FveHDZ30-F	GGCTTGACATGCTAGAGACTAC
	FveHDZ30-R	TCCCTGCTGCATCAGTTTAG
	FveNCED1-F	CAAAACAGGGGACCTCAAAACC
	FveNCED1-R	CTTGAGGTAAGGCTTCTGGACA
	FveCHC1-F	GTTTCCGCCACAACCTATACAT
	FveCHC1-R	TTTTCTCTGAGTTGGCCATTAGA
	FveSAG-F	GTCCACAACAGCAACAAAGAAG
	FveSAG-R	AACCTTGGAGCCAGCATAAG
